# Supplementary material
Source: Springer Nature journal article supplement (https://www.springermedizin.de/resource/supplementary/12885_2013_5203_MOESM7_ESM.pdf/9466448)
Supplement: MOESM7 [file 9466448]

**A**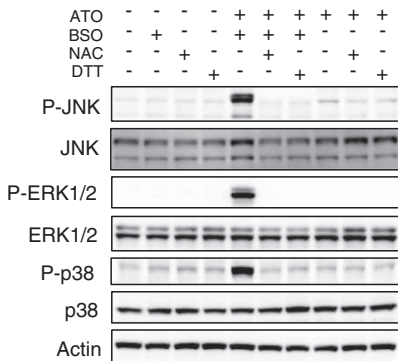**B**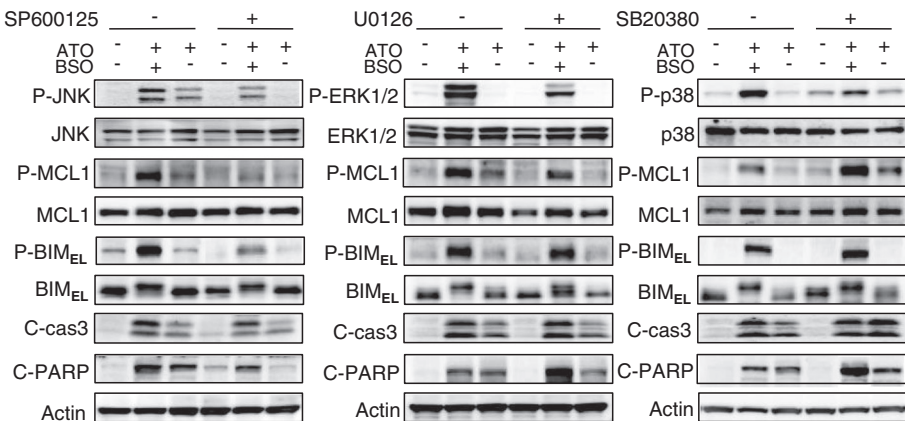

SP600125/PD901

|     |   |   |   |
|-----|---|---|---|
| -   | + |   |   |
| ATO | - | + | + |
| BSO | - | + | - |

P-JNK

JNK

P-BIM<sub>EL</sub>BIM<sub>EL</sub>

C-PARP

U0126/PD901

|     |   |   |   |
|-----|---|---|---|
| -   | + |   |   |
| ATO | - | + | + |
| BSO | - | + | - |

P-ERK1/2

ERK1/2

P-BIM<sub>EL</sub>BIM<sub>EL</sub>

C-PARP
